# Supplementary material for: Enhanced nanoencapsulation of gentamicin, ciprofloxacin, and lysozyme in chitosan-MIL-53 metal–organic frameworks for a synergistic activity against drug-resistant Salmonella from poultry and human origins
Source: Royal Society of Chemistry journal article supplement (doi:10.1039/d5ra09975g), 2026-04-16
Supplement: d5ra09975g1.pdf [file d5ra09975g1.pdf]

**Table S1.** Summary of ANOVA Results and Model Adequacy for the Five Quadratic Models

| Critical Quality Attribute (Response) | Model p-value | R <sup>2</sup> | Adjusted R <sup>2</sup> | Predicted R <sup>2</sup> | Adequate Precision |
|---------------------------------------|---------------|----------------|-------------------------|--------------------------|--------------------|
| Particle Size (Y <sub>1</sub> )       | < 0.0001      | 0.998          | 0.995                   | 0.986                    | 75.2               |
| Zeta Potential (Y <sub>2</sub> )      | < 0.0001      | 0.994          | 0.987                   | 0.962                    | 52.4               |
| EE% Gentamicin (Y <sub>3</sub> )      | < 0.0001      | 0.991          | 0.981                   | 0.941                    | 41.8               |
| EE% Ciprofloxacin (Y <sub>4</sub> )   | < 0.0001      | 0.997          | 0.994                   | 0.981                    | 68.9               |
| EE% Lysozyme (Y <sub>5</sub> )        | < 0.0001      | 0.989          | 0.977                   | 0.928                    | 38.5               |

**Table S2. Physicochemical Properties of the Optimized Chitosan-MIL-53(Fe) Nanoformulation**

| Critical Quality Attribute (CQA)            | Result (Mean ± SD, n=3) |
|---------------------------------------------|-------------------------|
| Particle Size (nm)                          | 248 ± 11                |
| Polydispersity Index (PDI)                  | 0.21 ± 0.02             |
| Zeta Potential (mV)                         | +33.8 ± 1.7             |
| Encapsulation Efficiency, Gentamicin (%)    | 68.5 ± 2.4              |
| Encapsulation Efficiency, Ciprofloxacin (%) | 85.1 ± 1.9              |
| Encapsulation Efficiency, Lysozyme (%)      | 39.7 ± 2.1              |
